# Supplementary material for: Grading variation in 2,934 patients with ductal carcinoma in situ of the breast: the effect of laboratory- and pathologist-specific feedback reports
Source: PubMed Central journal article supplement (PMC7216330; doi:10.1186/s13000-020-00970-8), 2020-05-11
Supplement: 13000_2020_970_MOESM1_ESM.pdf [file 13000_2020_970_MOESM1_ESM.pdf]

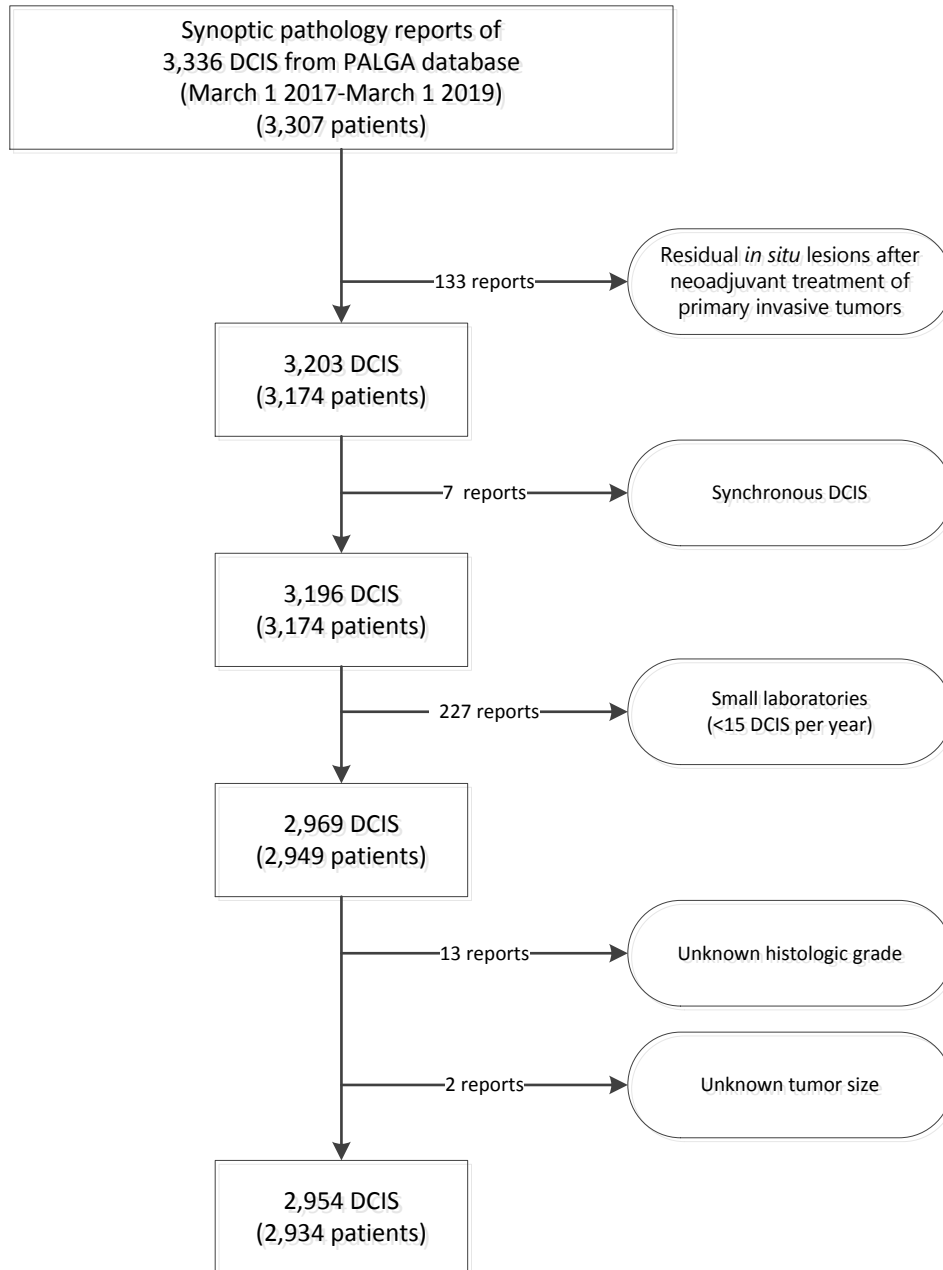

**Supplementary figure 1.** Flowchart of included pathology reports of ductal carcinoma *in situ* of the breast (DCIS) resection specimens to assess the effect of feedback reports on variation in histologic grading of DCIS.
